# Supplementary material for: Two fluorescent Schiff base sensors for Zn2+: the Zn2+/Cu2+ion interference
Source: Royal Society of Chemistry journal article supplement (doi:10.1039/c5an00789e), 2015-01-01
Supplement: c5an00789e1.pdf [file c5an00789e1.pdf]

# Two fluorescent Schiff base sensors for $Zn^{2+}$ : the $Zn^{2+}/Cu^{2+}$ ion interference

Arturo Jiménez-Sánchez,<sup>a</sup> Benjamín Ortiz,<sup>b</sup> Vianney Ortiz Navarrete,<sup>b</sup> Norberto Farfán,<sup>c</sup>  
and Rosa Santillan\*<sup>a</sup>

<sup>a</sup> Departamento de Química, Centro de Investigación y de Estudios Avanzados del IPN,  
Apdo. Postal 14-740, 07000, México, D.F., México.

<sup>b</sup> Departamento de Biomedicina Molecular, Centro de Investigación y de Estudios  
Avanzados del IPN, Apdo. Postal 14-740, 07000, México, D.F., México.

<sup>c</sup> Facultad de Química, Departamento de Química Orgánica, Universidad Nacional  
Autónoma de México, Ciudad Universitaria 04510, México D.F., México.

Correspondence should be addressed to e-mail: [rsantill@cinvestav.mx](mailto:rsantill@cinvestav.mx)

## Supplementary Information

| CONTENTS                                                                                                                                                                                                                  | PAGE |
|---------------------------------------------------------------------------------------------------------------------------------------------------------------------------------------------------------------------------|------|
| Experimental                                                                                                                                                                                                              | S2   |
| Synthesis and characterization of <b>L1</b> and <b>L2</b>                                                                                                                                                                 | S2   |
| <b>Scheme S1.</b> Synthetic methodology of compounds <b>L1</b> and <b>L2</b>                                                                                                                                              | S2   |
| <b>Figure S1.</b> UV-Vis and Fluorescence spectra for the titration of $Co^{2+}$ , $K^+$ , $Li^+$ , $Na^+$ , $Pb^{2+}$ , $Cd^{2+}$ , $Ni^{2+}$ , $Hg^{2+}$ , $Cu^{2+}$ and $Ca^{2+}$ with (a) <b>L1</b> and (b) <b>L2</b> | S3   |
| <b>Figure S2.</b> X-ray structures for <b>L1</b> and <b>L2</b>                                                                                                                                                            | S8   |
| <b>Figure S3.</b> Fluorescence kinetics for <b>L1</b> and <b>L2</b>                                                                                                                                                       | S8   |
| <b>Figure S4.</b> Hyperquad $\log K_a$ refinement and Hill plots for association constants ( $\log K_a$ ) of $Zn^{2+}/Cu^{2+}$                                                                                            | S9   |
| <b>Figure S5.</b> UV-Vis spectra for <b>L1</b> and <b>L1•Zn</b> solvent polarity effect                                                                                                                                   | S11  |
| <b>Figure S6.</b> $^1H$ NMR spectra for <b>L1</b> and <b>L2</b> upon addition of $Zn^{2+}$ , $Cu^{2+}$ and $Fe^{2+}$ in $DMSO-d_6$                                                                                        | S12  |
| <b>Figure S7.</b> UV-Vis spectra for tartrate anion interaction with <b>L2•Zn</b>                                                                                                                                         | S17  |
| <b>Figure S8.</b> UV-Vis spectra for ATP interaction with <b>L2•Zn</b>                                                                                                                                                    | S17  |
| <b>Figure S9.</b> Absorption spectra showing the colorimetric response process for <b>L1</b> and <b>L2</b> in the presence of $Fe^{2+}$ ions                                                                              | S18  |
| <b>Figure S10.</b> Spectrophotometric titration for the pH profile of <b>L1</b> and <b>L2</b>                                                                                                                             | S19  |

**Figure S11.** Fluorescence spectra of **L1** in a sample containing both, Zn<sup>2+</sup> and Cu<sup>2+</sup> **S19**

**Figure S12.** FACS flow cytometry for **L2** with Zn<sup>2+</sup> and Cu<sup>2+</sup> **S20**

**Figure S13.** Computed (PBE0/6-31G(d)/PCM) Charge Transfer properties for **L1** / **L2** **S21**

**Table S1.** NTO pair orbital distribution for **L2**, **L2•Zn** and **L2•Cu** **S22**

## Experimental

All reagents and solvents are commercially available and used as received. The solvents were HPLC grade. The <sup>1</sup>H and <sup>13</sup>C NMR spectra were recorded on a JEOL ECA+500, using CD<sub>3</sub>OD and CDCl<sub>3</sub> as solvent. Chemical shifts were reported in parts per million (ppm) relative to internal TMS. Mass spectra were recorded with an Agilent Technologies MS TOF using the ESI(+) technique. UV-vis absorption spectra were recorded in a Perkin Elmer UV/VIS Spectrophotometer Lambda 12 and fluorescence spectra in a Varian Cary Eclipse Fluorescence Spectrometer. All fluorescence quantum yield measurements were obtained by using the experimental procedure reported in reference 19 from main text, reference 1 from ESI.

## Synthesis and characterization of **L1** and **L2**

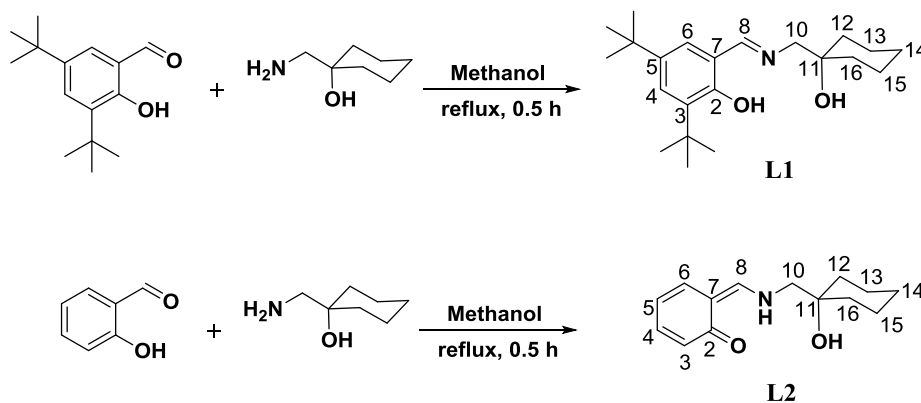

**Scheme S1.** Synthetic methodology for **L1** and **L2**.

*2,4-di-tert-butyl-6-[(1-hydroxycyclohexylmethylimino)methyl]phenol (L1).* The title compound was synthesized by subtle modifications of a previously reported methodology [2] from 3,5-di-tert-butyl salicylaldehyde 0.50 g (2.13 mmol) and 1-aminomethyl-1-cyclohexanol hydrochloride 0.35 g (2.13 mmol) under reflux of methanol for 30 min, using a Dean-Stark trap to give a yellow powder in >90% yield of **L1**. m.p.: 98–100 °C. IR (KBr)  $\nu_{\max}$ : 3438 (OH), 2958, 2935, 2866, 1628 (C=N), 1596, 1474, 1441, 974, 887, 852, 715 cm<sup>-1</sup>. <sup>1</sup>H NMR (CDCl<sub>3</sub>, 400 MHz)  $\delta$ : 13.59 (1H, br, OH), 8.37 (1H, s, H-8), 7.40 (1H, d, J = 2.3 Hz, H-4), 7.11 (1H, d, J = 2.3 Hz, H-6), 3.58 (2H, s, CH<sub>2</sub>-10), 1.72–1.47 [10H, m, (-CH<sub>2</sub>)<sub>5</sub>], 1.45 [9H, s, -C(CH<sub>3</sub>)<sub>3</sub>], 1.31 [9H, s, -C(CH<sub>3</sub>)<sub>3</sub>]. <sup>13</sup>C NMR (CDCl<sub>3</sub>, 100 MHz)  $\delta$ : 168.1 (C-8), 158.2 (C-2), 140.3 (C-5), 136.8 (C-3), 127.2 (C-4), 126.2 (C-6), 117.9 (C-7), 71.6 (C-11), 70.4 (C-10), 35.9 (C-12 and C-16), 35.1 (-C(CH<sub>3</sub>)<sub>3</sub>), 34.2 (-C(CH<sub>3</sub>)<sub>3</sub>), 31.6 (-C(CH<sub>3</sub>)<sub>3</sub>), 29.5 (-C(CH<sub>3</sub>)<sub>3</sub>), 26.0 (C-14), 22.0 (C-13 and C-15). Anal. Calcd. for C<sub>22</sub>H<sub>35</sub>N<sub>1</sub>O<sub>2</sub>: C 76.48, H 10.21, N 4.05; found: C 76.42, H 10.18, N 4.18. HR-APCI-MS:  $m/z$  for C<sub>22</sub>H<sub>35</sub>NO<sub>2</sub> [M + H]<sup>+</sup> calc.: 346.2741, found: 346.2745.

*2-[(1-hydroxycyclohexyl)methylimino)methyl]phenol (L2).* The title compound was prepared from salicylaldehyde 0.20 g (1.64 mmol) and 1-aminomethyl-1-cyclohexanol hydrochloride 0.27 g (1.64 mmol) under reflux for 30 min, to give 0.36 g (1.55 mmol, 95% yield) of **L2**. m.p.: 156–158 °C. IR (KBr)  $\nu_{\max}$ : 3221 (NH), 3050, 2925, 2850, 1644 (C=O), 1611 (C=N), 1524,

1288, 1146, 912, 742  $\text{cm}^{-1}$ .  $^1\text{H}$  NMR ( $\text{CDCl}_3$ , 400 MHz)  $\delta$ : 13.41 (1H, br, OH), 8.35 (1H, s, H-8), 7.32-7.26 (2H, m, H-4 and H-6), 6.96-6.90 (1H, m, H-3), 6.89-6.86 (1H, m, H-5), 3.58 (2H, s,  $\text{CH}_2$ -10), 2.16 (1H, s, br, OH), 1.72-1.53 (8H, m,  $\text{CH}_2$ -12,  $\text{CH}_2$ -13,  $\text{CH}_2$ -15 and  $\text{CH}_2$ -16), 1.33-1.28 (2H, m,  $\text{CH}_2$ -14).  $^{13}\text{C}$  NMR ( $\text{CDCl}_3$ , 100 MHz)  $\delta$ : 166.9 (C-8), 161.3 (C-2), 132.5 (C-4), 131.5 (C-6), 118.9 (C-7), 118.7 (C-5), 117.2 (C-3), 71.5 (C-11), 70.2 (C-10), 35.8 (C-12 and C-16), 25.8 (C-14), 21.9 (C-13 and C-15). Anal. Calcd. for  $\text{C}_{14}\text{H}_{19}\text{N}_1\text{O}_2$ : C 72.07, H 8.21, N 6.00; found: C 72.16, H 8.19, N 6.12. HR-APCI-MS:  $m/z$  for  $\text{C}_{14}\text{H}_{19}\text{NO}_2$   $[\text{M} + \text{H}]^+$  calc.: 234.1489, found: 234.1491.

**Figure S1.** UV-Vis and Fluorescence spectra for the titration of (a) **L1** and (b) **L2** with  $\text{Co}^{2+}$ ,  $\text{K}^+$ ,  $\text{Li}^+$ ,  $\text{Na}^+$ ,  $\text{Pb}^{2+}$ ,  $\text{Cd}^{2+}$ ,  $\text{Ni}^{2+}$ ,  $\text{Hg}^{2+}$ ,  $\text{Cu}^{2+}$  and  $\text{Ca}^{2+}$ . The Stock solutions of metal acetates ( $1 \times 10^{-4}$  mol  $\text{L}^{-1}$ ) and **L1** / **L2** ( $1 \times 10^{-5}$  mol  $\text{L}^{-1}$ ) were prepared in water and water : methanol (95 : 5, v/v), respectively.

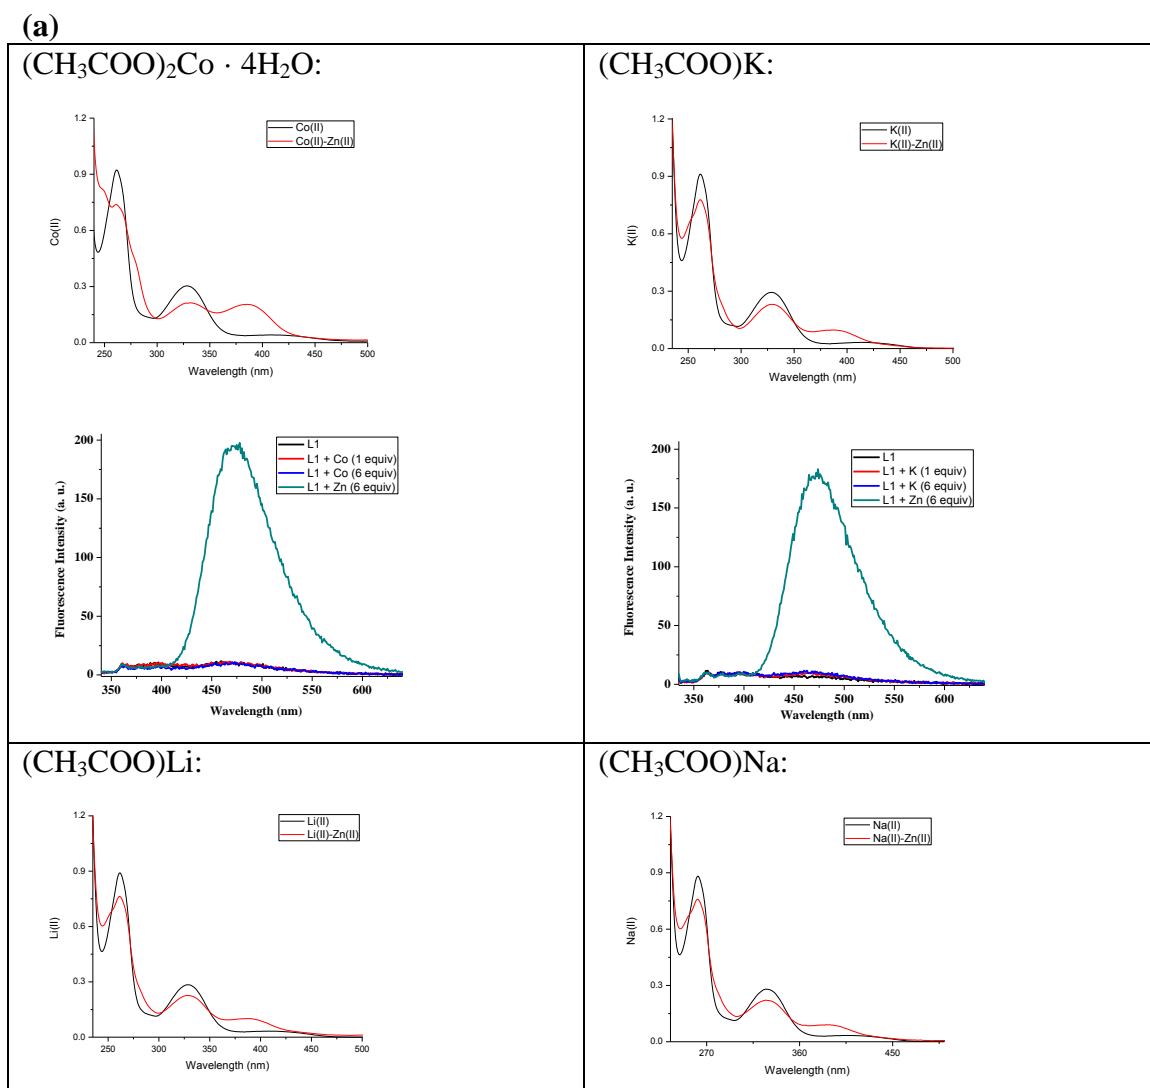

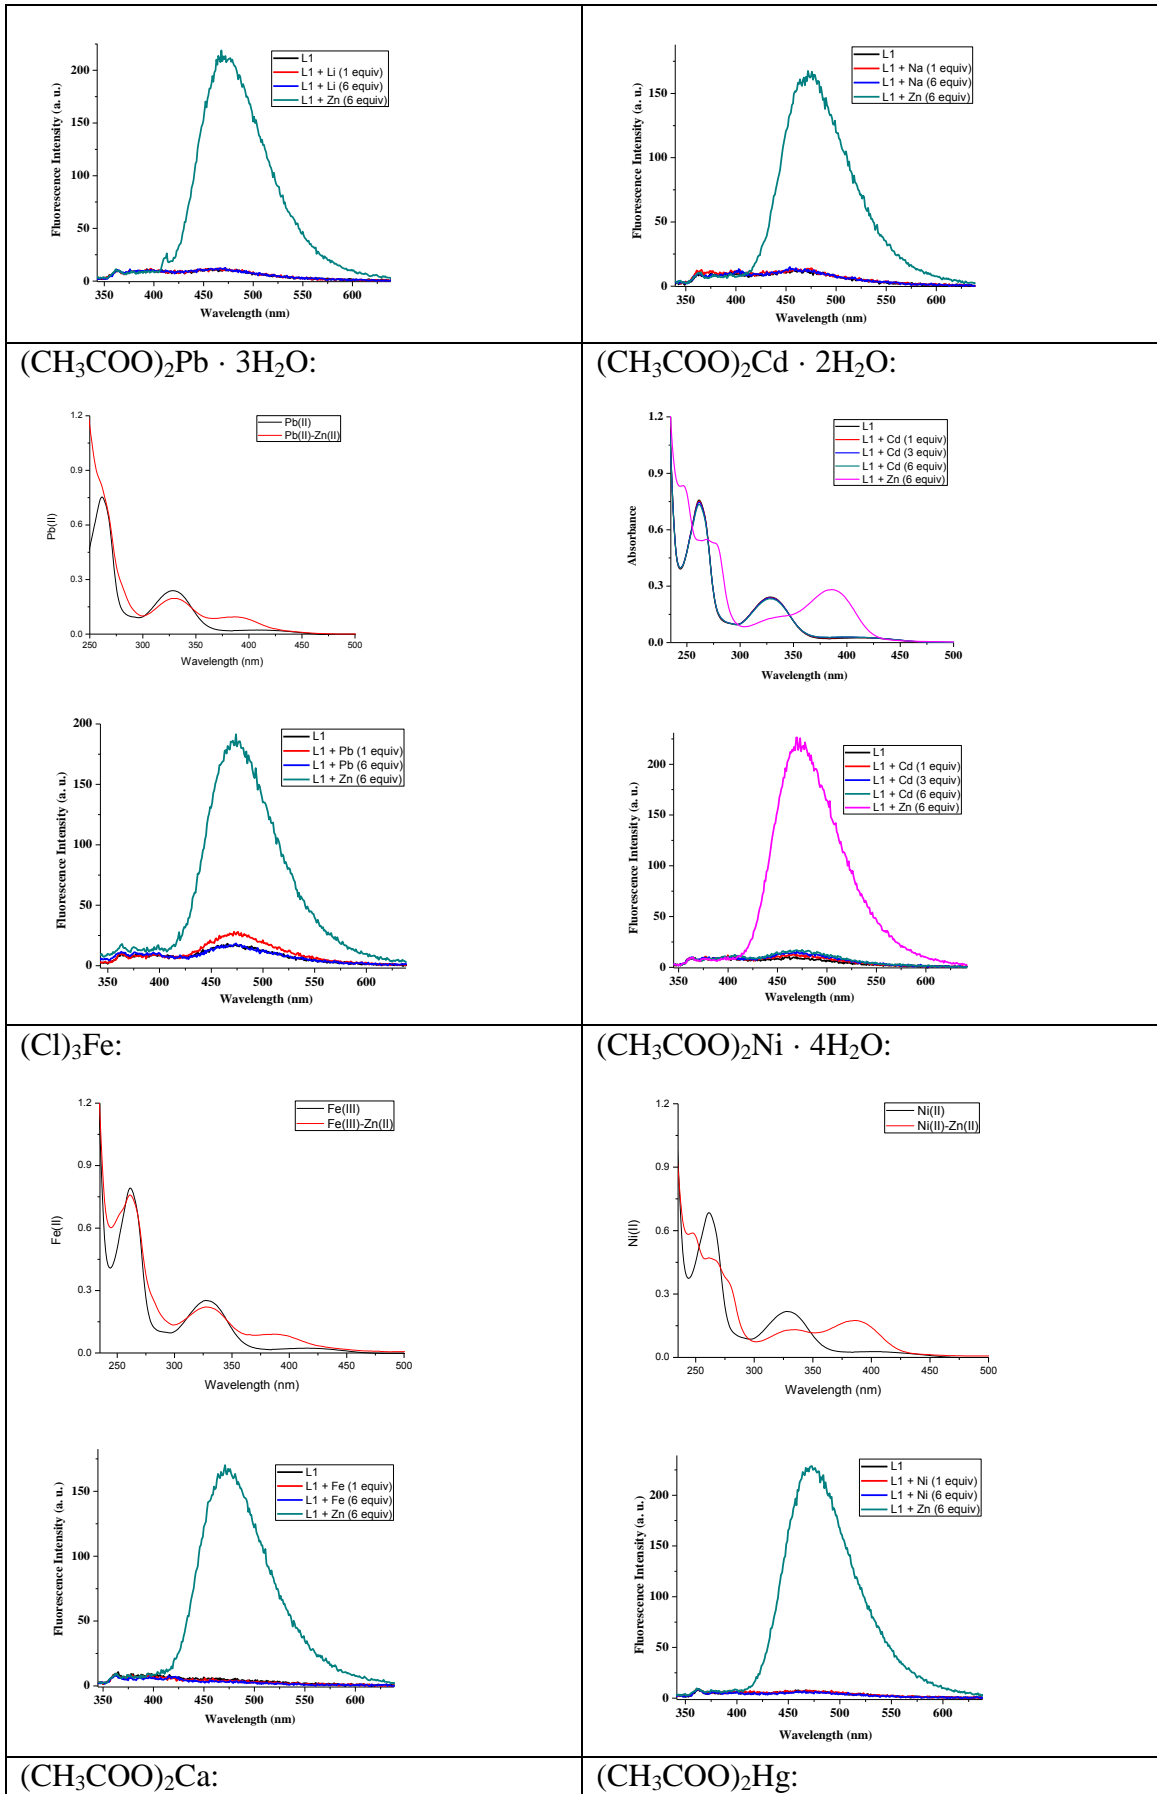

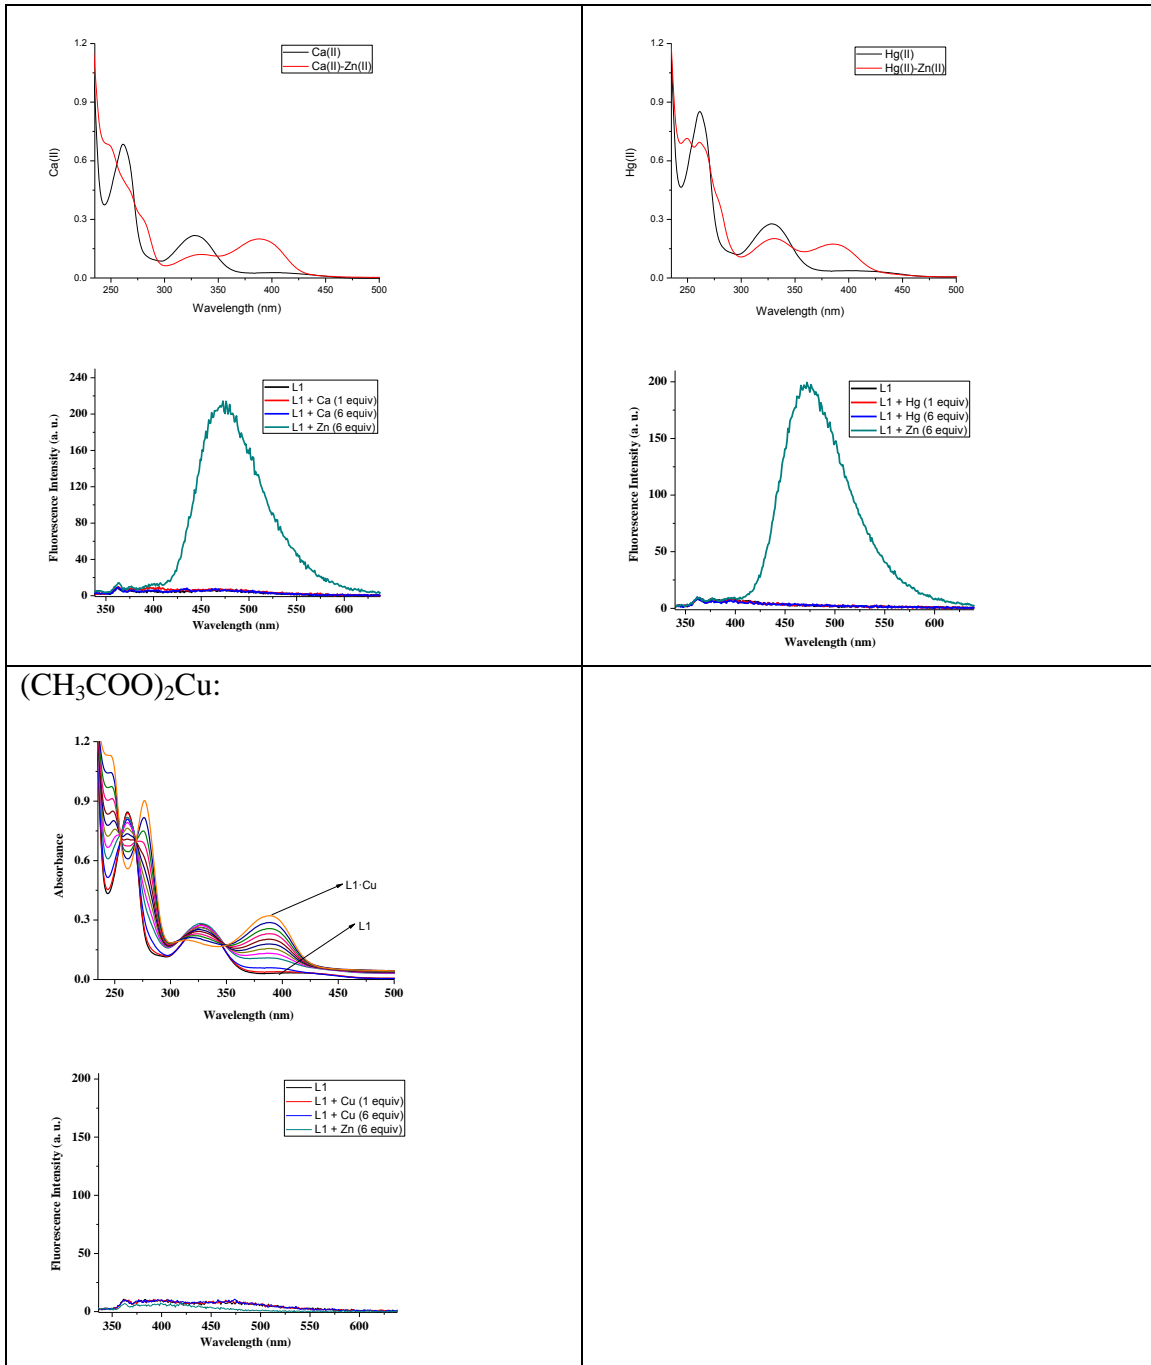

(b)

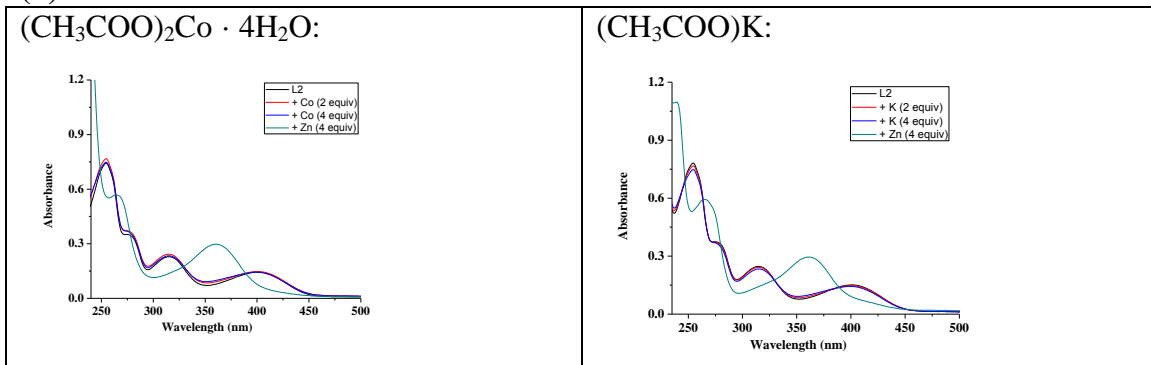

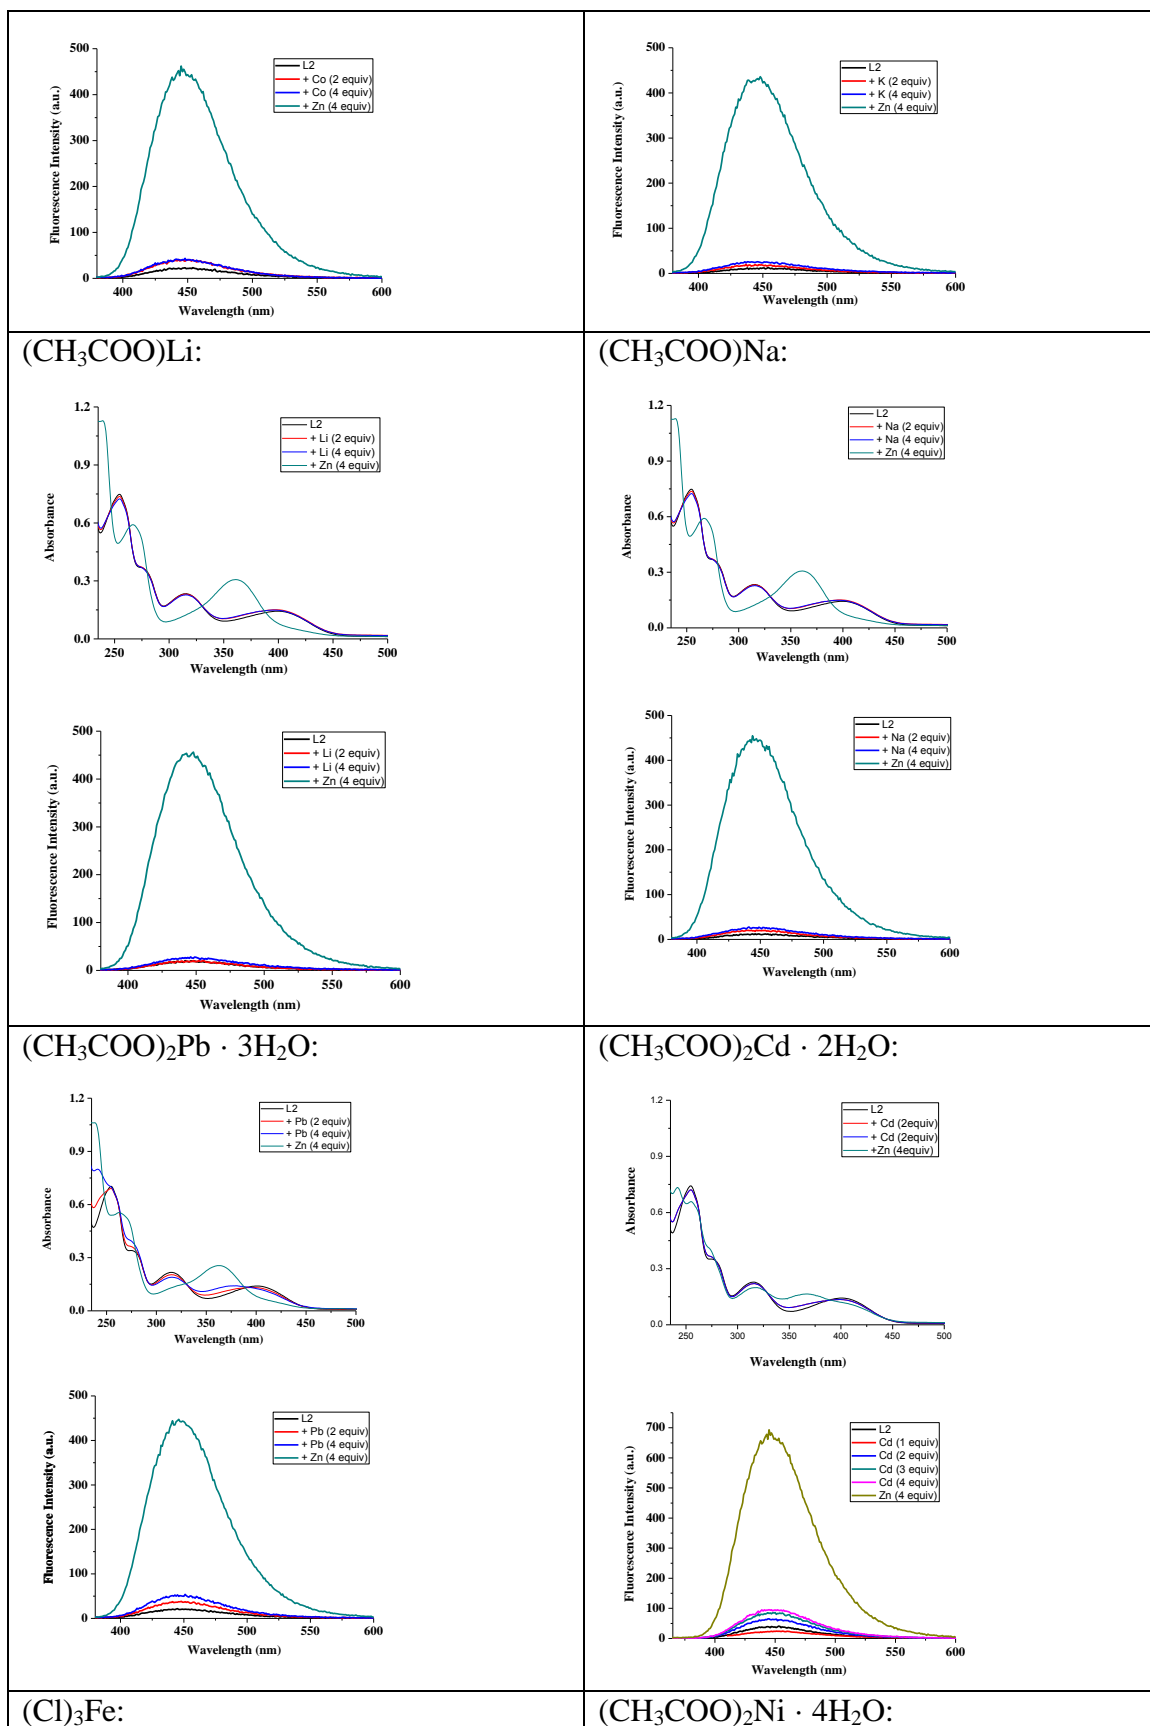

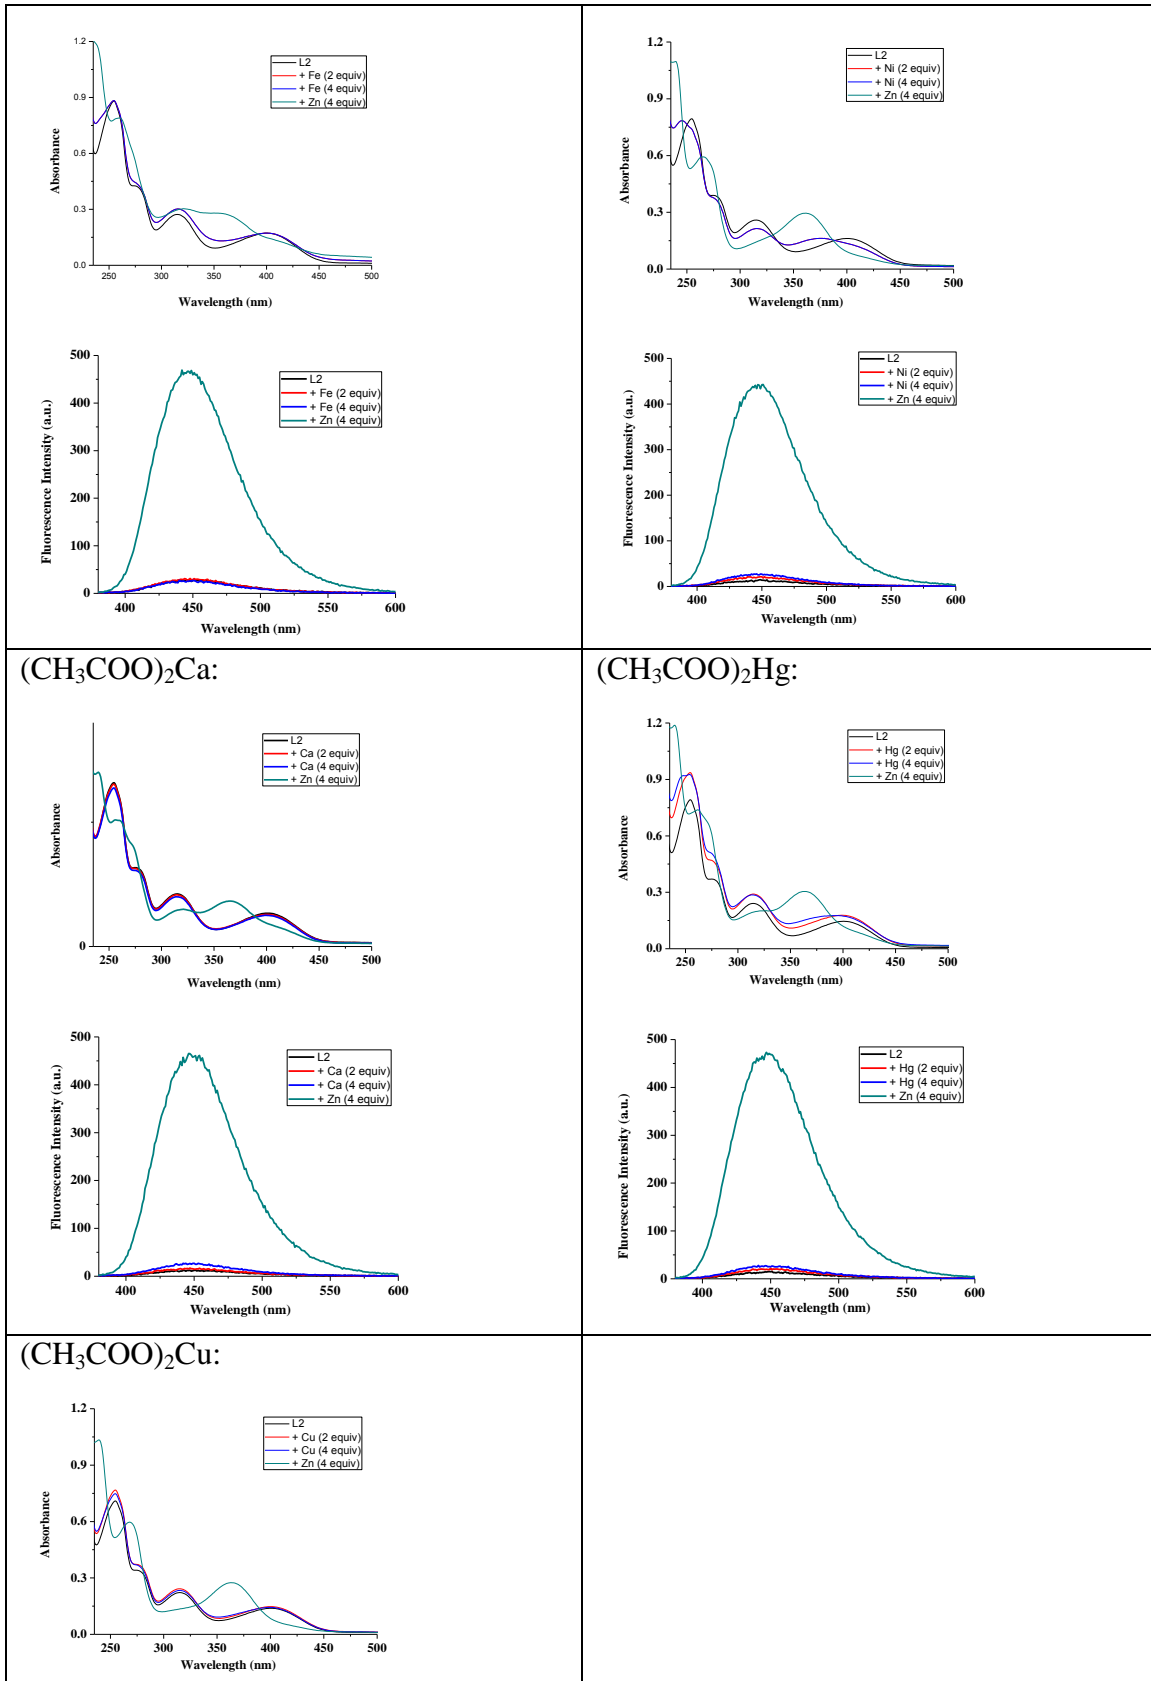

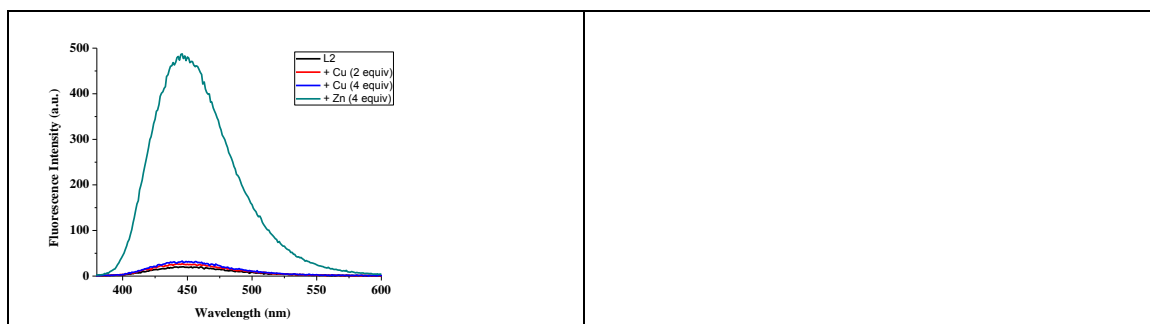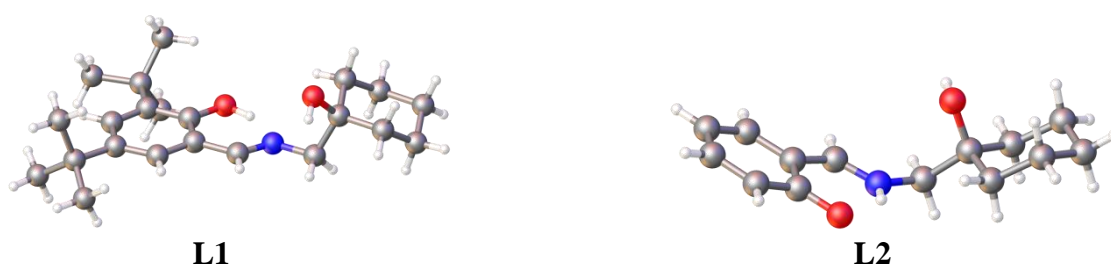

**Figure S2.** X-ray structures for **L1** and **L2** (CCDC reference number 712147 and 712149, respectively). O. Domínguez, B. Rodríguez-Molina, M. Rodríguez, A. Ariza, N. Farfán and R. Santillan, *New J. Chem.*, 2011, **35**, 156.).

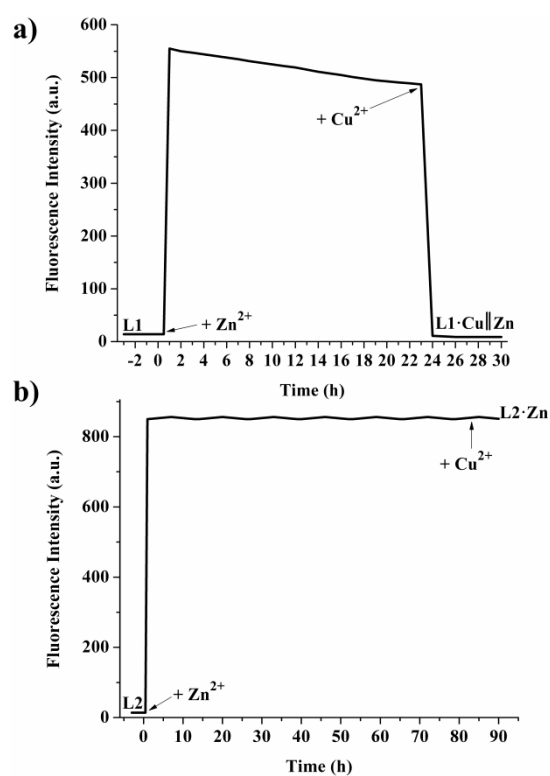

**Figure S3.** Fluorescence kinetics for: a) **L1** (2 mM) upon addition of Zn<sup>2+</sup> (t = 120 s) to form **L1•Zn** and Cu<sup>2+</sup> (t = 23 h) to form **L1•Cu**; and b) **L2** (2 mM) upon addition of Zn<sup>2+</sup> (t = 120 s) to form **L2•Zn** and Cu<sup>2+</sup> (t = 83 h) remaining the **L2•Zn** complex.



**Figure S4.** HyperQuad log  $K_a$  refinement for L-Zn complexes and Hill plots for association constants (log  $K_a$ ) of  $Zn^{2+}/Cu^{2+}$  based on  $(\log(Y/1 - Y) ) n \log [M^{2+}] + \log K$ .

(a)

**L2-Zn in 1:1 relation**

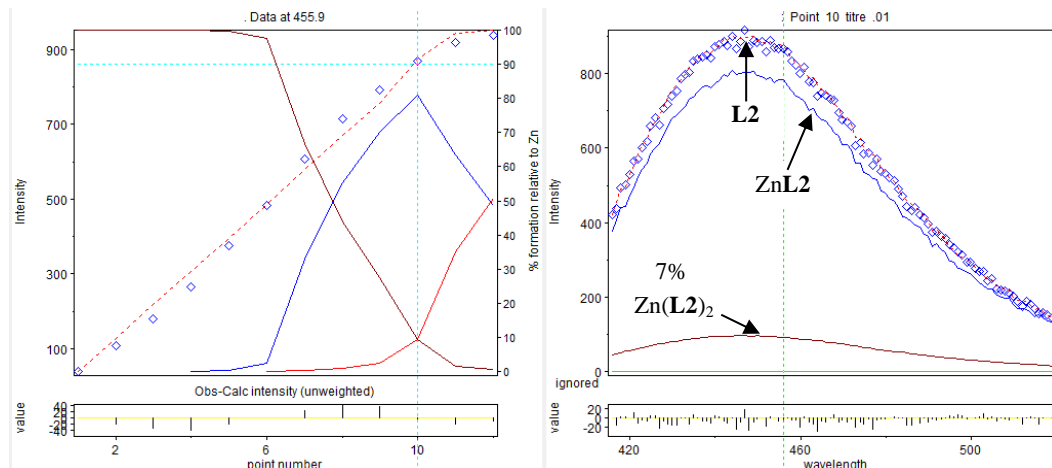

**L2-Zn in 1:2 relation**

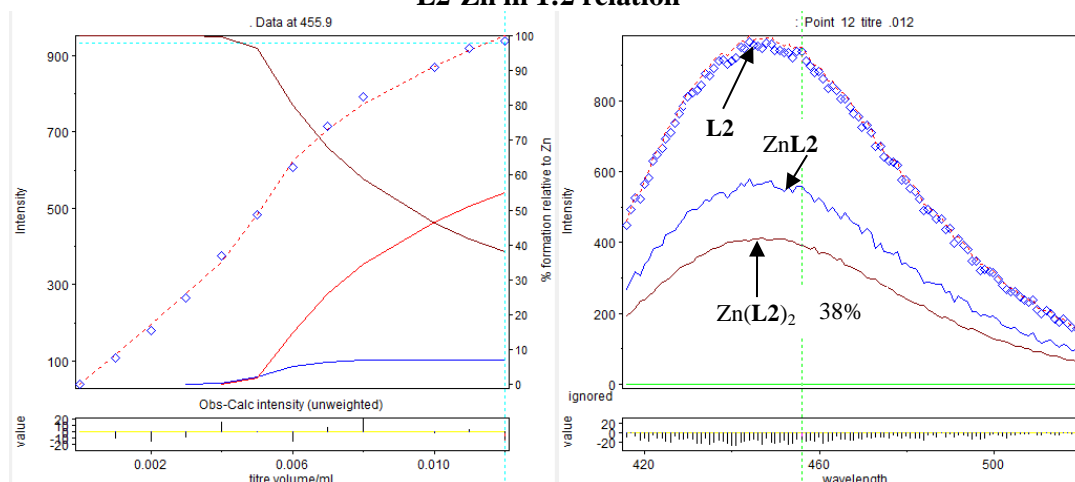

HypSpec. Refinement concluded at 02/06/2015 04:43:21 p. m.  
 Data from C:\Users\ARTURO JIMÉNEZ\Desktop\tBSZn.HQD (modified)  
 Project title:  
 25 (maximum) Iterations performed

| Log beta | value   | standard deviation |
|----------|---------|--------------------|
| ZnL      | 8.4465  | 0.0789             |
| ZnL2     | 10.8138 | 0.0972             |

Correlation coefficients

2 1.0  
 1

Parameter numbers

1 ZnL  
 2 ZnL2

### Hill Plot for L2-Zn:

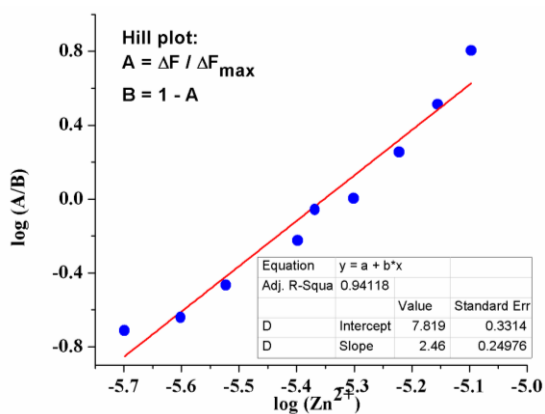

(b)

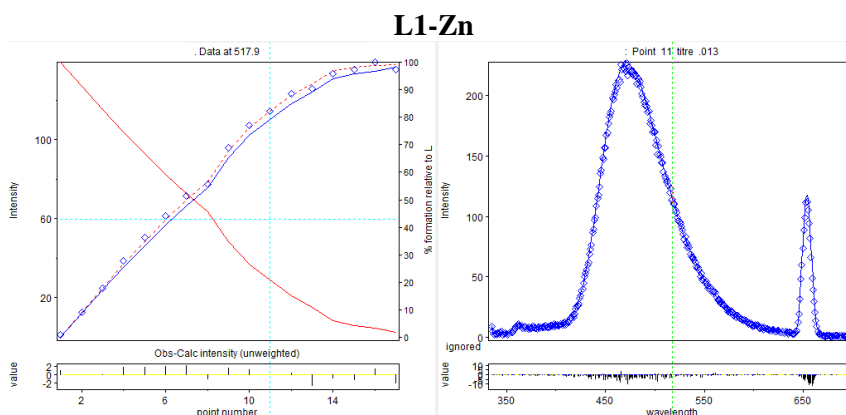

|     | Log beta | value  | standard deviation |
|-----|----------|--------|--------------------|
| LZn |          | 5.2771 | 0.0048             |

### Hill plot

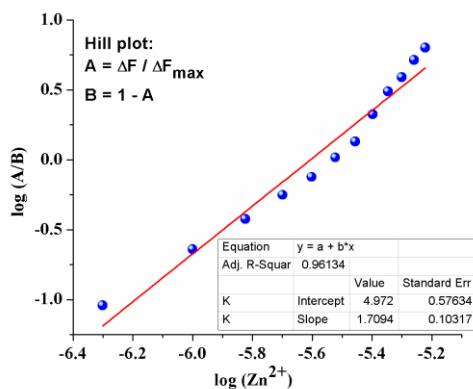

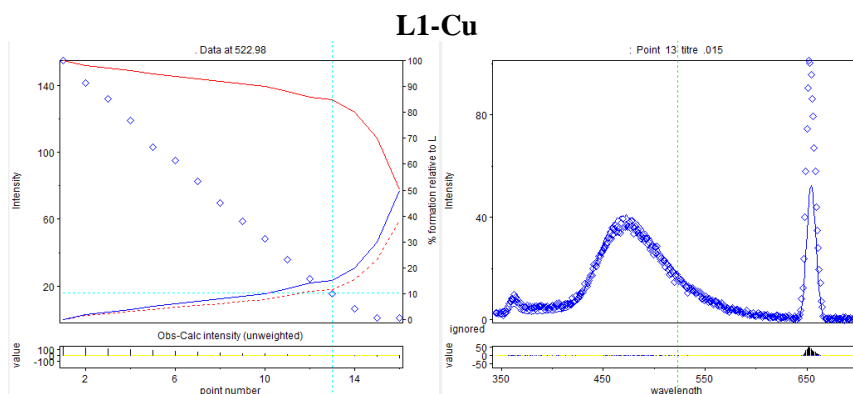

HypSpec. Refinement concluded at 24/10/2014 06:50:39 p. m.  
 Project title:  
 Converged in 8 iterations with sigma = 5.698

| Log beta | value  | standard deviation |
|----------|--------|--------------------|
| LCu      | 8.5416 | 0.062              |

**Figure S5.** UV-Vis spectra for L1 and L1•Zn solvent polarity effect

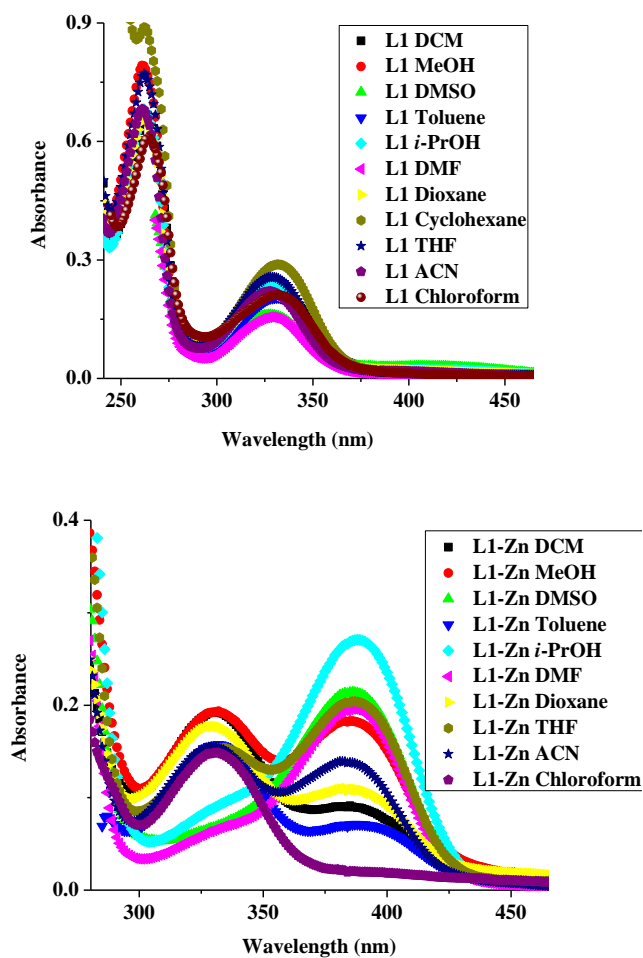

**Figure S6.**  $^1\text{H}$  NMR spectra for **L1** and **L2** upon addition of  $\text{Zn}^{2+}$  and  $\text{Cu}^{2+}$  in  $\text{DMSO-}d_6$ :

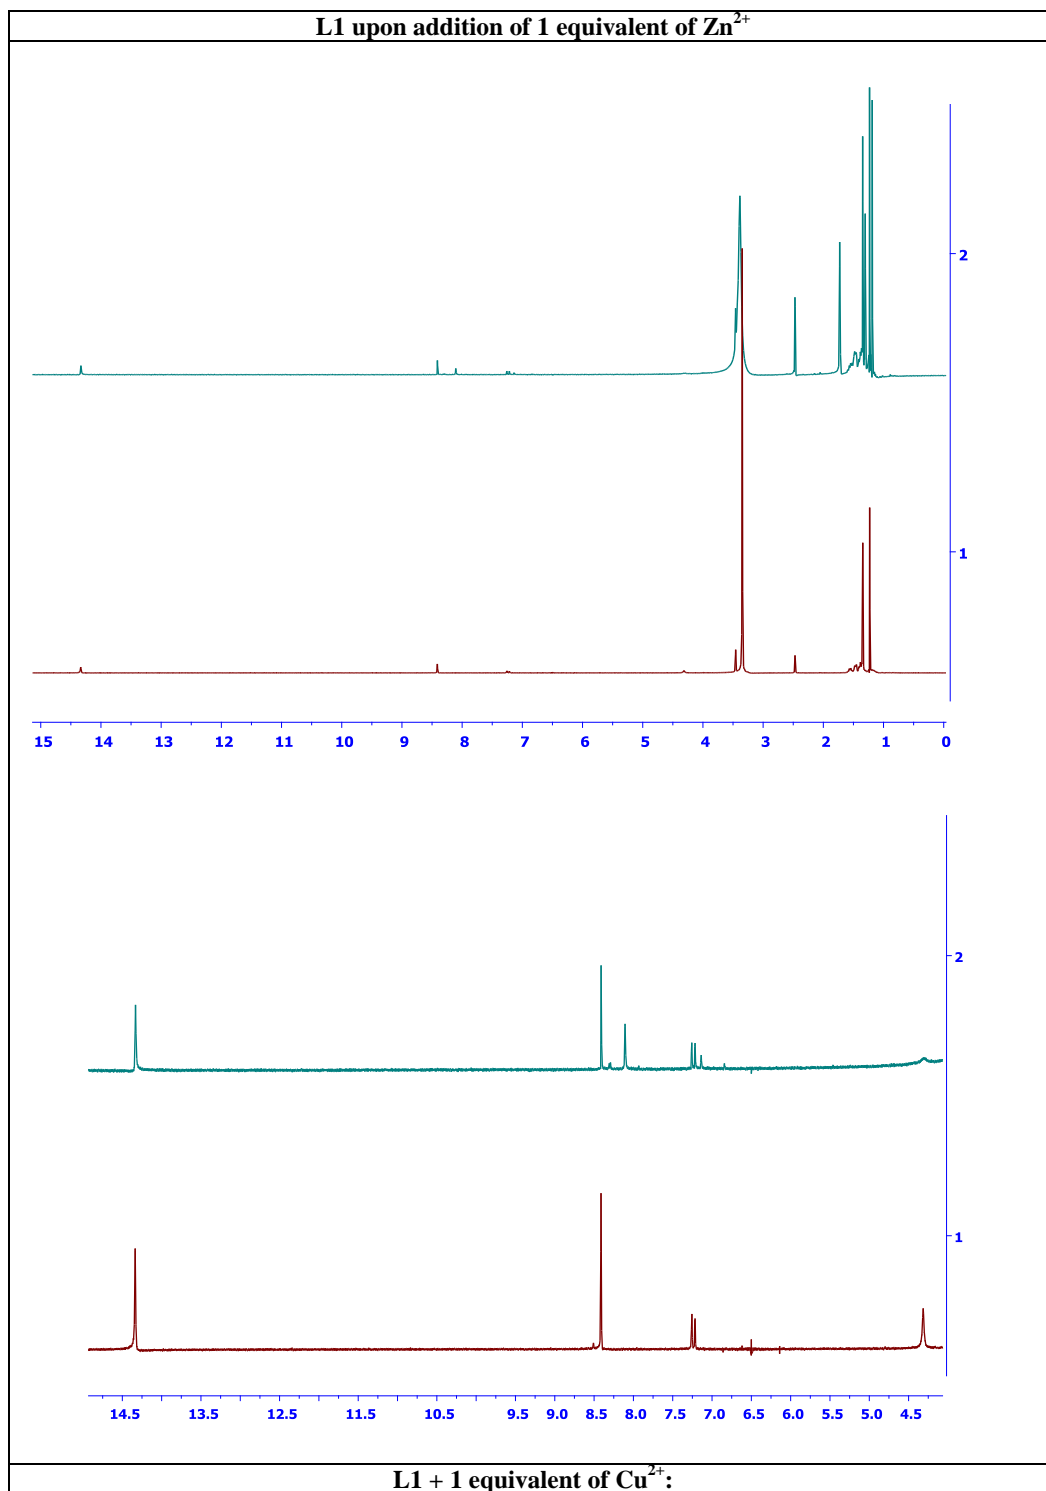

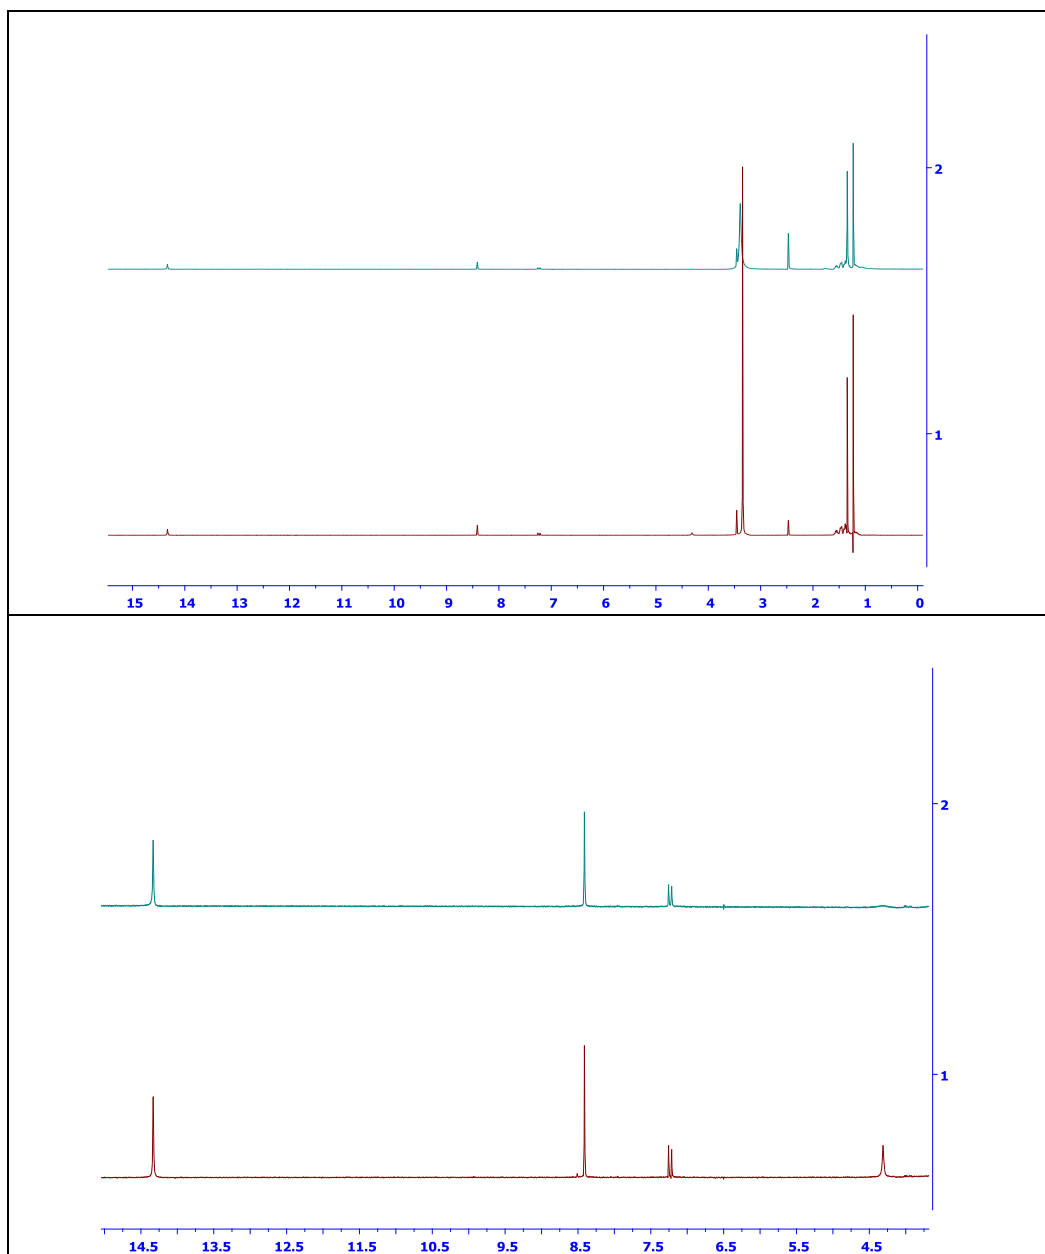

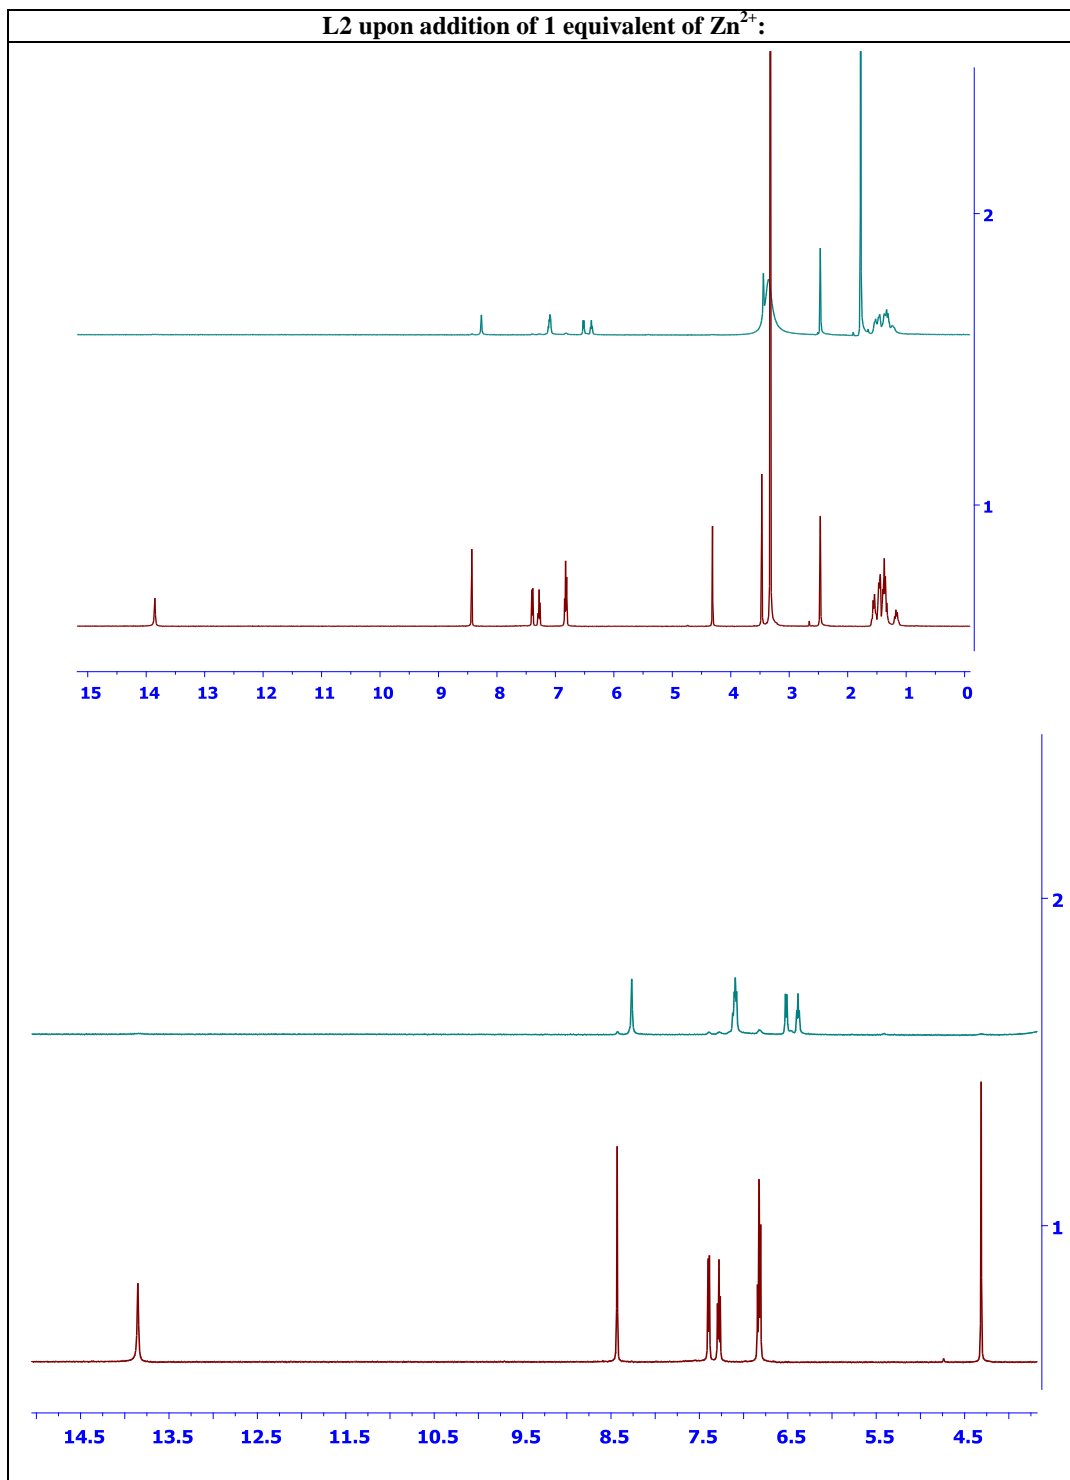

**L1 upon addition of 1 equivalent of Fe<sup>2+</sup>:**

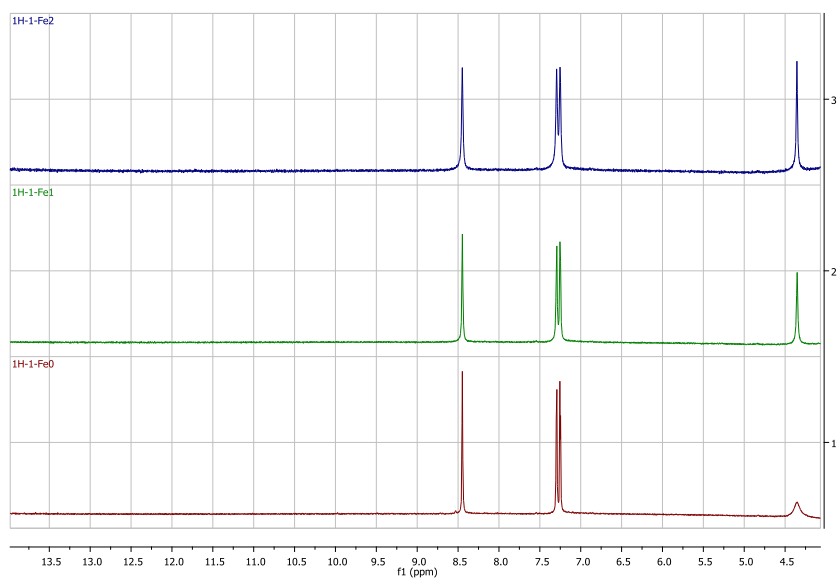

**L2 upon addition of 1 equivalent of Fe<sup>2+</sup>:**

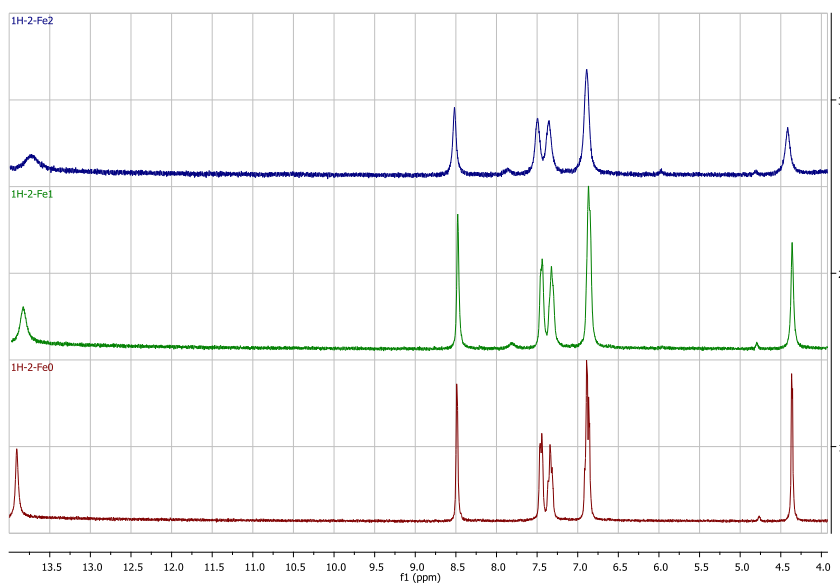

**Figure S7.** UV-Vis spectra for sodium tartrate anion interaction with **L2•Zn**

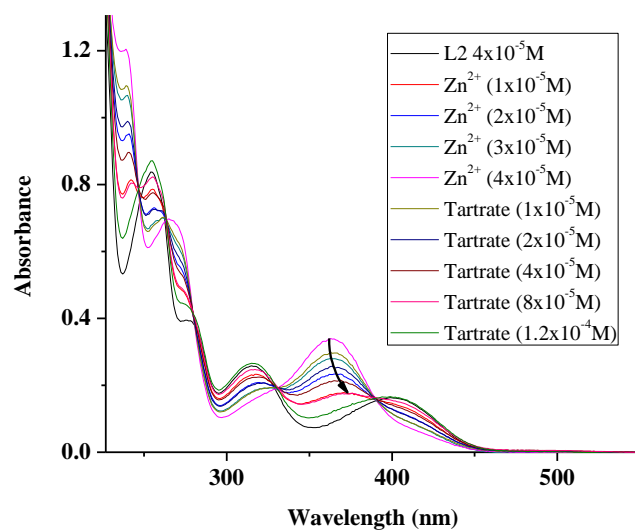

**Figure S8.** UV-Vis spectra for Adenosine 5'-triphosphate disodium salt hydrate interaction with **L2•Zn**

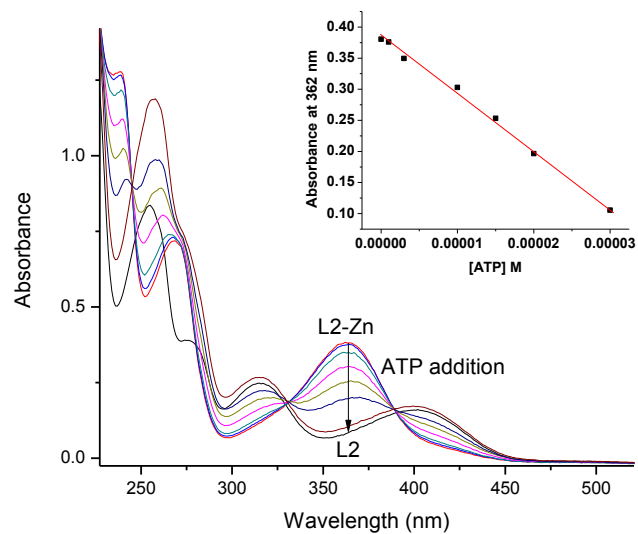



**Figure S9.** Absorption spectra showing the colorimetric response process for **L1** and **L2** in the presence of  $\text{Fe}^{2+}$  ions in water : methanol solution (95 : 5, v/v, 10 mM HEPES) (a). Color changes upon addition of 2 equiv. of different ions to: (b) **L1** and (c) **L2**, in the visible (above) and under 365 nm UV-light (below).

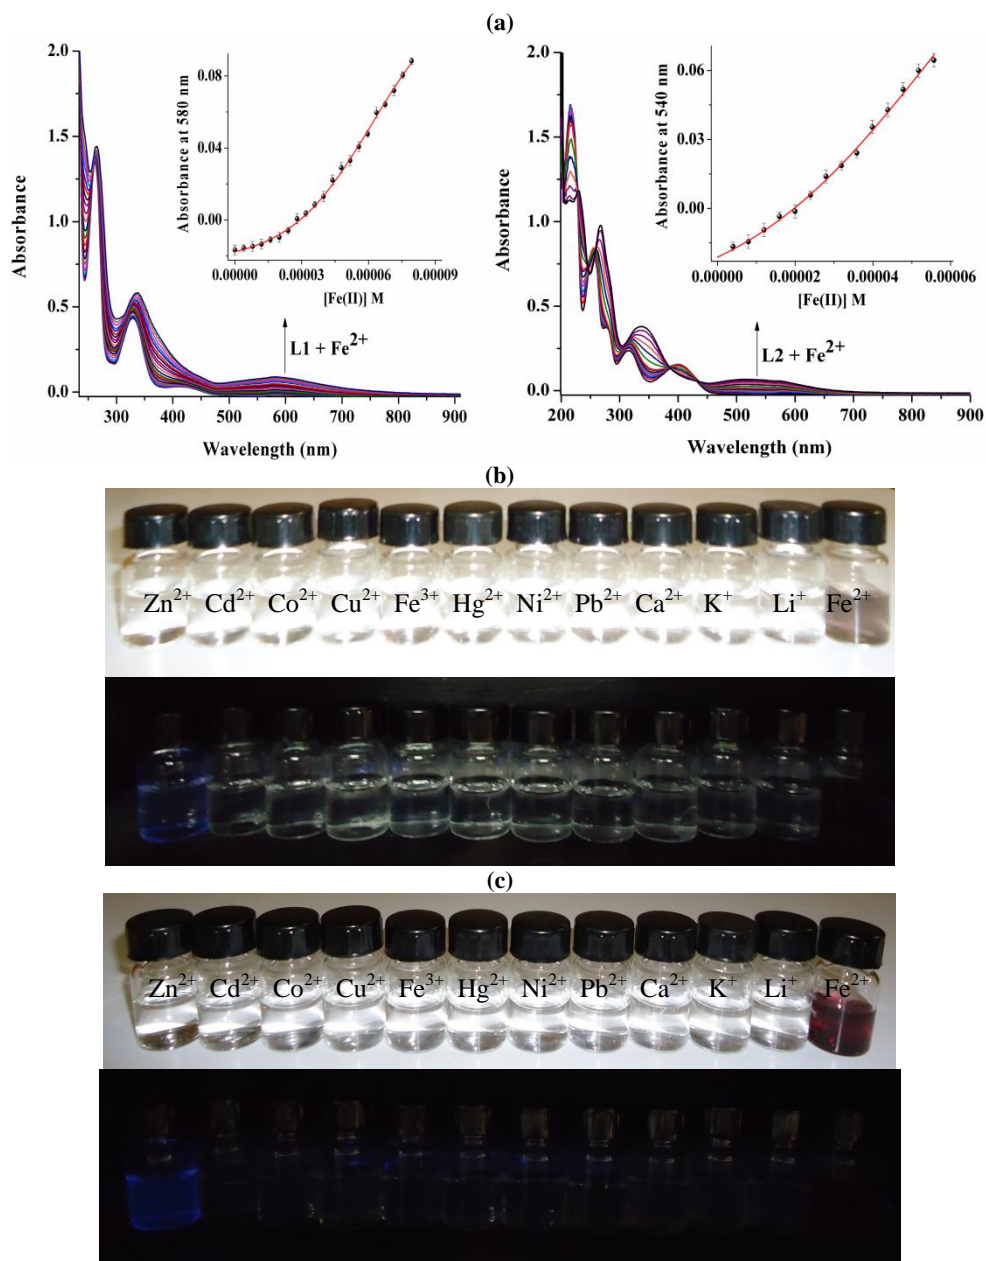

**Figure S10.** Spectrophotometric titration for the pH profile of (a) **L1** and (b) **L2** in acid (left) and basic (right) media.

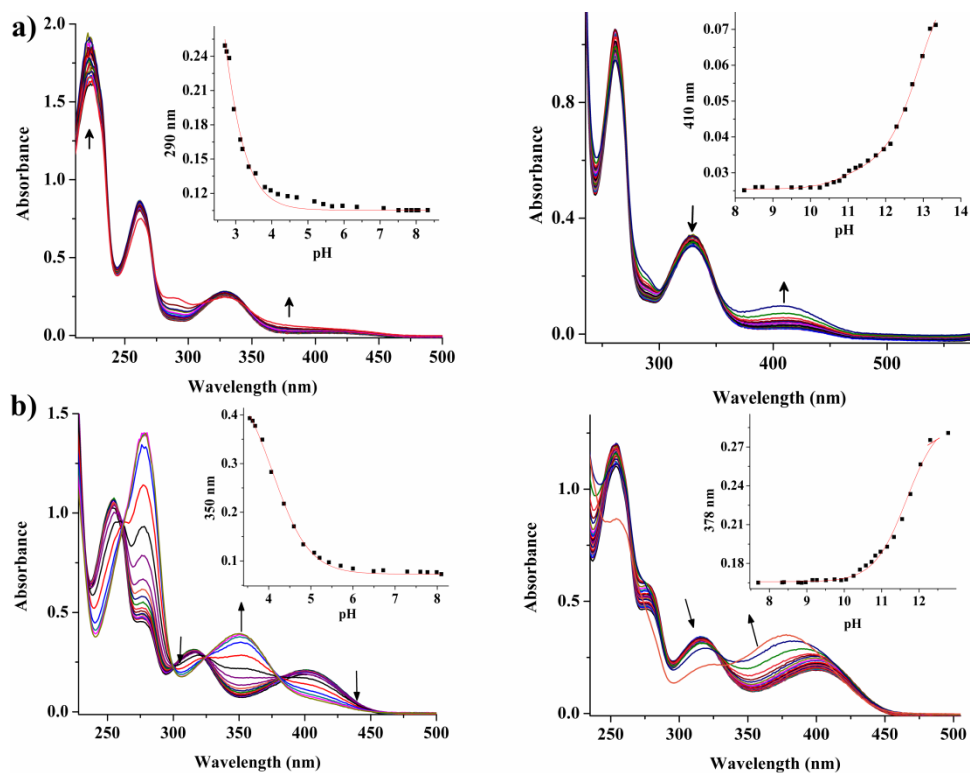

**Figure S11.** Fluorescence spectra of **L1** in a sample containing both,  $\text{Zn}^{2+}$  and  $\text{Cu}^{2+}$  metal ions. Gray line, no fluorescence response was observed upon addition of **L1** to the  $\text{Cu}^{2+}$  saturated solution; and blue line, the observed fluorescence response upon addition of  $\text{S}^{2-}$  anions, indicating the presence of  $\text{Zn}^{2+}$  and  $\text{Cu}^{2+}$  in the same test sample. Excitation wavelength at  $\lambda_{\text{ex}} = 365$  nm.

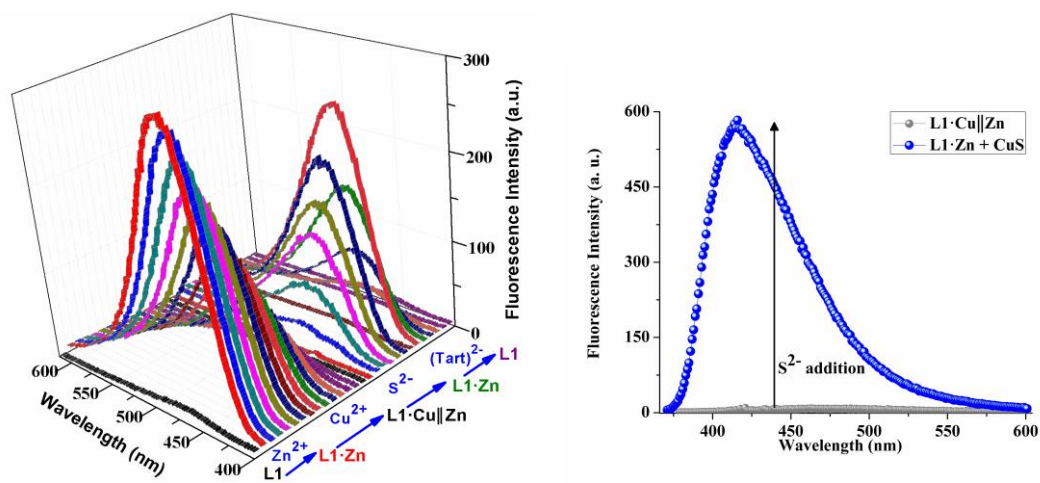

**Figure S12.** FACS flow cytometry for **L2** with  $Zn^{2+}$  and  $Cu^{2+}$ . Jurkat cells were cultured in the presence of  $20\ \mu M$  of  $Zn^{2+}$  and  $20\ \mu M$  of  $Cu^{2+}$  for 4 hours, then **L2** was incubated for 30 min. Dot plots show forward scatter (FSC-A) vs. side scatter (SSC-A) and histograms show fluorescence intensity at 450 nm. Gated cells were selected according to side (FSC-A) and complexity (SSC-A) and emission of fluorescence at 450 nm was analyzed on live cells (histograms). Dead cells were excluded during acquisition by using propidium iodide (PI).

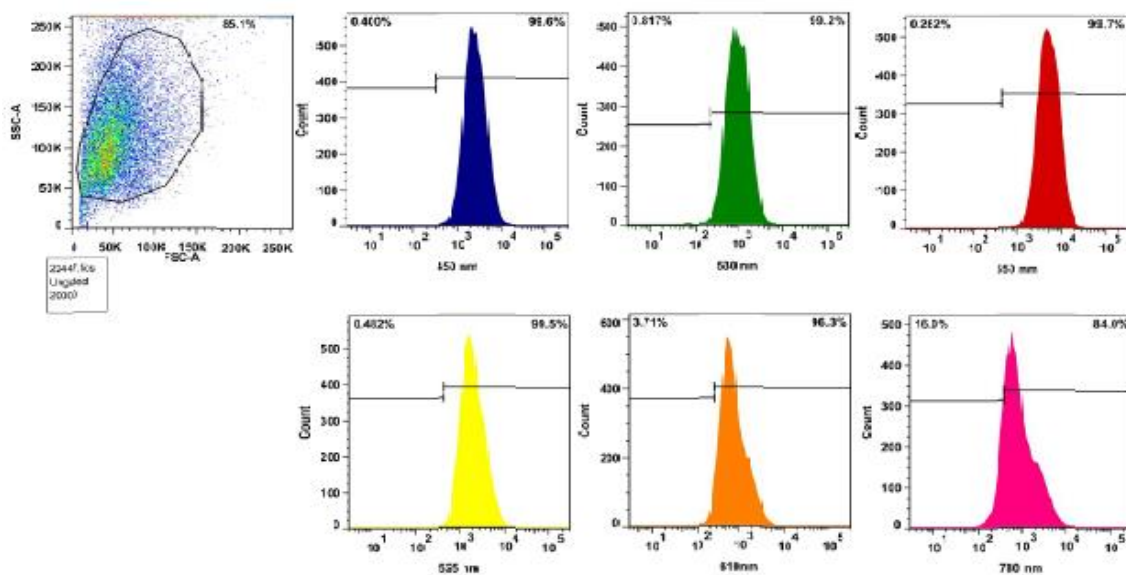

**Figure S13.** Computed (PBE0/6-31G(d)/PCM): a) mapped electrostatic potential for; b) difference in total electron density computed for the ground and first excited states; b)  $D_{CT}$  graphical representation; and c) centroids of charge ( $C_+(r)/C_-(r)$ ), representing the excess electron density in the ground (green) and excited (red) state, for **L1** (left) and **L2** (right). Reference 28-29 from the Main text or references 3 and 4 from this file.

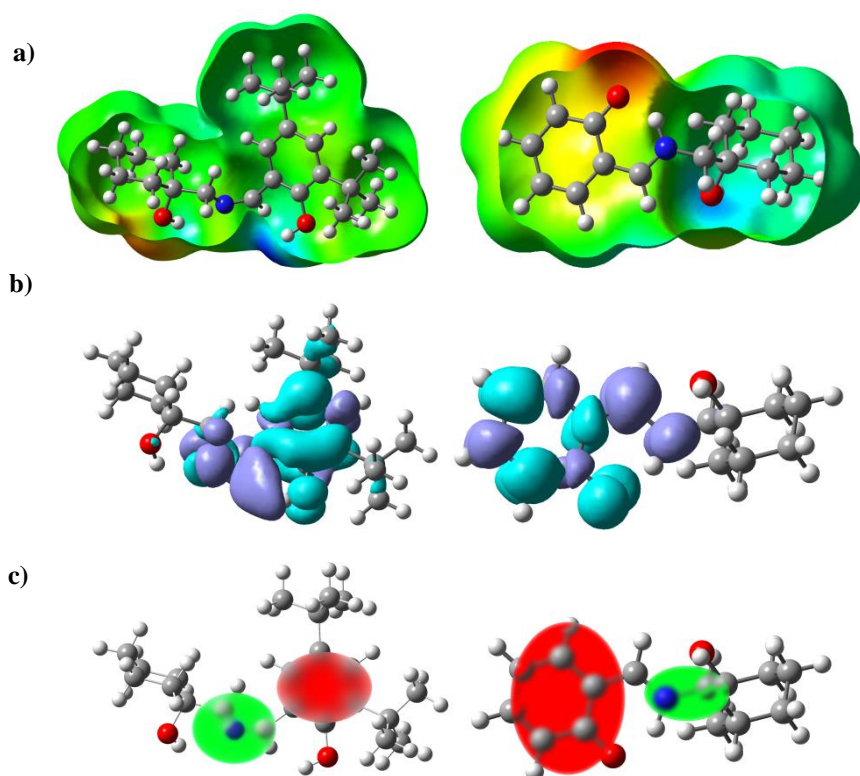

We studied the charge transfer excitation parameters by means of the recently proposed spatial extent index [28-29]. For **L1** the obtained fraction of electron charge transferred upon de-excitation from the local excited (LE) state was  $q_{CT} = 0.51$  at a  $D_{CT} = 2.75$  Å spatial distance from the donor centroid to the acceptor centroid. Moreover, the dipole moment difference was estimated to be 6.68 D. Thus, Figure S8 shows the graphical representation of  $D_{CT}$ , and excess of electron density centroids ( $C_+(r)/C_-(r)$ ) as defined in refs [28-29]. The  $H$  index defined as half of the sum of the centroid axis along the Donor – Acceptor direction is 1.18 Å, which resulted to be 1.58 Å lower than the CT excitation length, this means almost no overlap between donor and acceptor centroids, which makes the CT process highly efficient. However, in the case of **L2** being a more rigid ligand, the electronic communication obtained by means of this spatial extent index revealed a  $q_{CT} = 0.62$  at a  $D_{CT} = 1.97$  Å spatial distance from the donor to the acceptor centroid, representing a larger fraction of electron charge transferred, despite the smaller transition dipole moment of 5.01 D. The obtained spatial distance for **L2** is larger; hence, the difference between  $H$  index = 1.47 Å represents less overlap between donor and acceptor centroids, which makes the CT process highly efficient.

**Table S1.** (a) Molecular Orbital contribution; Oscillator strength (f); transition wavelength (nm) and energy (eV) values and NTO coefficient (w) for the free ligand **L2**, **L2•Zn** and **L2•Cu**. (b) NTO pairs for sensor **L1**.

(a)

| Electronic transition | Properties                                                     | Hole | Electron | Assign                                                 |
|-----------------------|----------------------------------------------------------------|------|----------|--------------------------------------------------------|
| $S_0 \rightarrow S_1$ | HOMO – LUMO;<br>f = 0.174; 372 nm<br>(3.33 eV)<br>w = 0.94     |      |          | $Sal \pi \rightarrow Sal \pi^*$                        |
| $S_0 \rightarrow S_3$ | HOMO-1 – LUMO+2<br>f = 0.091; 348 nm<br>(3.56 eV)<br>w = 0.82  |      |          | $Sal \pi \rightarrow Sal \pi^*$                        |
| $S_0 \rightarrow S_6$ | HOMO-2 – LUMO+1;<br>f = 0.369; 265 nm<br>(4.17 eV)<br>w = 0.78 |      |          | $\pi \rightarrow Sal \pi^*$                            |
| $S_0 \rightarrow S_2$ | HOMO – LUMO+1;<br>f = 0.183; 354 nm<br>(3.50 eV)<br>w = 0.86   |      |          | ${}^1MLCT;$<br>$d_{x^2-y^2} \pi \rightarrow Sal-\pi^*$ |
| $S_0 \rightarrow S_5$ | HOMO-1 – LUMO+2;<br>f = 0.091; 366 nm<br>(3.37 eV)<br>w = 0.89 |      |          | ${}^1MLCT;$<br>$\pi \rightarrow all-\pi^*$             |
| $S_0 \rightarrow S_1$ | HOMO – LUMO;<br>f = 0.078; 328 nm<br>(3.78 eV)<br>w = 0.81     |      |          | $d_z^2 \pi \rightarrow all-\pi^*$                      |
| $S_0 \rightarrow S_2$ | HOMO-1 – LUMO+1;<br>f = 0.142; 367 nm<br>(3.37 eV)<br>w = 0.92 |      |          | $all-\pi \rightarrow all-\pi^*$                        |

(b)

|                       |                                                               |  |  |                                 |
|-----------------------|---------------------------------------------------------------|--|--|---------------------------------|
| $S_0 \rightarrow S_1$ | HOMO – LUMO;<br>f = 0.236; 328 nm<br>(3.78 eV)<br>w = 0.92    |  |  | $Sal \pi \rightarrow Sal \pi^*$ |
| $S_0 \rightarrow S_3$ | HOMO-1 – LUMO+2<br>f = 0.063; 302 nm<br>(4.10 eV)<br>w = 0.87 |  |  | $Sal \pi \rightarrow Sal \pi^*$ |

1 S. Fery-Forgues, D. Lavabre, *J. Chem. Educ.*, 1999, **76**, 1260.

2 O. Domínguez, B. Rodríguez-Molina, M. Rodríguez, A. Ariza, N. Farfán, R. Santillan, *New J. Chem.*, 2011, **35**, 156.

3 M. J. Frisch, G. W. Trucks, H. B. Schlegel, G. E. Scuseria, M. A. Robb, J. R. Cheeseman, *et al.* Gaussian 03, Revision C.02, Wallingford CT, Gaussian, Inc., 2004.

4 C. Adamo, D. Jacquemin, *Chem. Soc. Rev.*, 2013, **42**, 845.
